# Supplementary material
Source: publisher figshare collection journal article supplement (https://acs.figshare.com/ndownloader/files/20576793)
Supplement: Supplementary file 1 [file 20576793]

## Supporting Information

Title: Female preference and adverse developmental effects of glyphosate-based herbicide on ecologically relevant traits in Japanese quails

Authors: Suvi Ruuskanen\*<sup>1</sup>, Miia Rainio<sup>1</sup>, Venla Kuosmanen<sup>2</sup>, Miika Laihonen<sup>3</sup>, Kari Saikkonen<sup>3</sup>, Irma Saloniemi<sup>1</sup>, Marjo Helander<sup>1</sup>

<sup>1</sup>Department of Biology, University of Turku, Vesilinnantie 5, 20500 Turku, Finland

<sup>2</sup>Department of Biology, University of Jyväskylä, Seminaarinkatu 15, 40014, Finland

<sup>3</sup> Biodiversity Unit, University of Turku, Vesilinnantie 5, 20500 Turku, Finland

\*corresponding author: skruus@utu.fi

Table S1. The first choice (number of individuals choosing either GBH food or control food, CO) of Japanese quails (males and females) in each of the four two-choice behavioral trials. Individuals that did not approach either feeder were excluded from the analyses. Chi-square tests and associated p-values separately for each trial are presented.

|            | 1st Trial                   |        | 2nd Trial                  |        | 3rd Trial                  |        | 4th Trial                  |        | Total                    |
|------------|-----------------------------|--------|----------------------------|--------|----------------------------|--------|----------------------------|--------|--------------------------|
|            | Male                        | Female | Male                       | Female | Male                       | Female | Male                       | Female |                          |
| <b>GBH</b> | 5                           | 8      | 6                          | 7      | 5                          | 8      | 3                          | 7      | 49                       |
| <b>CO</b>  | 5                           | 10     | 3                          | 12     | 3                          | 8      | 8                          | 9      | 58                       |
|            | $\chi^2 = 0.078$ , p = 0.77 |        | $\chi^2 = 2.18$ , p = 0.13 |        | $\chi^2 = 0.33$ , p = 0.56 |        | $\chi^2 = 0.76$ , p = 0.38 |        | $\chi^2 = 1.13$ p = 0.28 |
